# Supplementary material
Source: HighWire-hosted journal article supplement (http://www.cmaj.ca/highwire/filestream/59137/field_highwire_adjunct_files/2/diet-salvado-11-at.pdf)
Supplement: diet-salvado-11-at.pdf [file diet-salvado-11-at.pdf]

## Appendix 11: Relative risk of reversion of metabolic syndrome and its components by intervention group (as supplied by the authors)

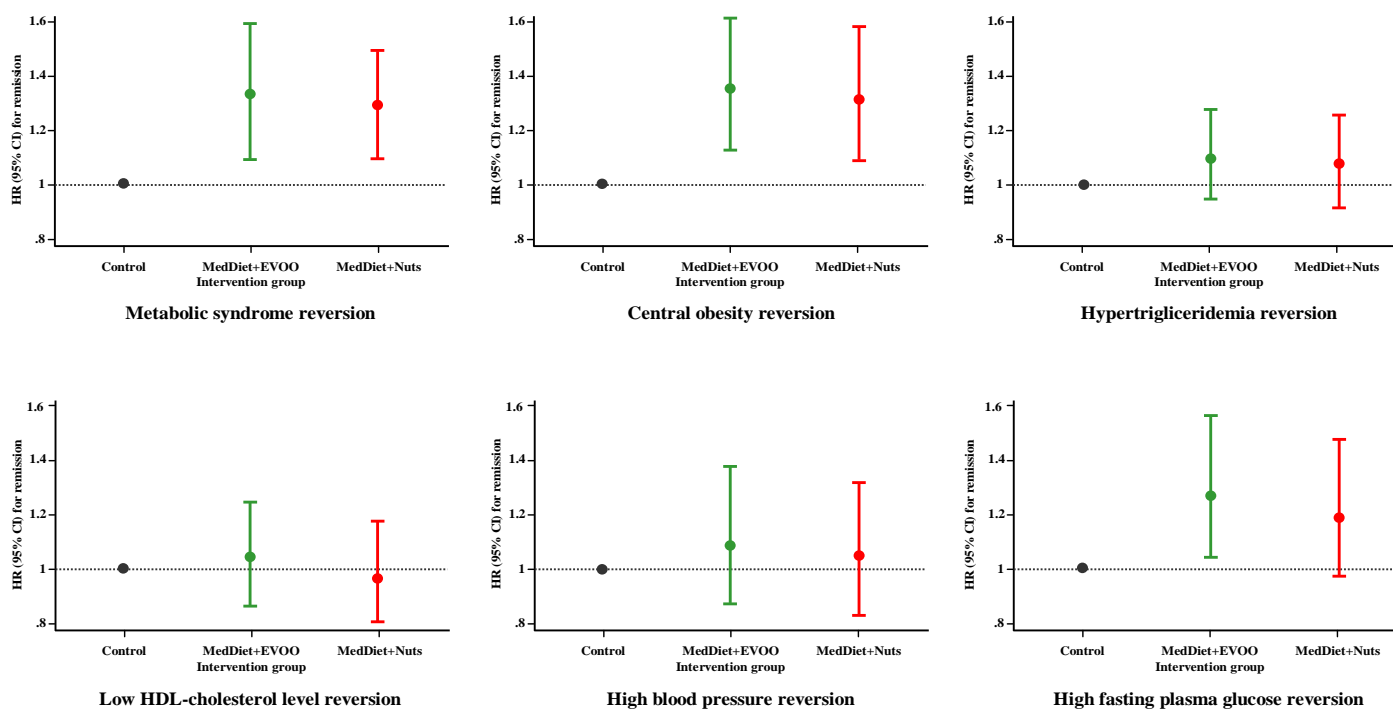

Abbreviations: MedDiet, Mediterranean diet; EVOO, Extra-virgin olive oil; HDL, High-density lipoprotein.
